# Supplementary material for: Obesity Prevention within the Early Childhood Education and Care Setting: A Systematic Review of Dietary Behavior and Physical Activity Policies and Guidelines in High Income Countries
Source: MDPI journal article supplement (doi:10.3390/ijerph18020838), 2021-01-19
Supplement: s1 [file s1]

**Table S1.** Online Database Search Strategy.

| <b>Medline Search: Inception- September 2020</b> |                                                                                              |
|--------------------------------------------------|----------------------------------------------------------------------------------------------|
| 1.                                               | (Early childhood education and care).mp.                                                     |
| 2.                                               | Kinder*.mp.                                                                                  |
| 3.                                               | Early education.mp.                                                                          |
| 4.                                               | Preschool.mp.                                                                                |
| 5.                                               | Child care/                                                                                  |
| 6.                                               | 1 or 2 or 3 or 4 or 5                                                                        |
| 7.                                               | Food/                                                                                        |
| 8.                                               | Nutrition.mp.                                                                                |
| 9.                                               | Diet/                                                                                        |
| 10.                                              | Healthy eating.mp.                                                                           |
| 11.                                              | Physical activity.mp.                                                                        |
| 12.                                              | Exercise/                                                                                    |
| 13.                                              | Physical fitness/                                                                            |
| 14.                                              | Screen time/                                                                                 |
| 15.                                              | Sedentary.mp.                                                                                |
| 16.                                              | Sleep/                                                                                       |
| 17.                                              | Obes*.mp.                                                                                    |
| 18.                                              | 7 or 8 or 9 or 10 or 11 or 12 or 13 or 14 or 15 or 16 or 17                                  |
| 19.                                              | Exp guideline/                                                                               |
| 20.                                              | Guideline as topic                                                                           |
| 21.                                              | Exp practice guideline/                                                                      |
| 22.                                              | Health planning guidelines/                                                                  |
| 23.                                              | (guideline or practice guideline).pt                                                         |
| 24.                                              | (position statement* or policy* statement* or practice parameter* or best practice*)ti,ab,kw |
| 25.                                              | (standards or guideline or guidelines).ti,ab,kw                                              |
| 26.                                              | ((practice) adj guideline*).ab.                                                              |
| 27.                                              | Consensus*.ti,ab,kw                                                                          |
| 28.                                              | Recommendat*.ti,ab,kw                                                                        |
| 29.                                              | Benchmarks.mp.                                                                               |
| 30.                                              | 19 or 20 or 21 or 22 or 23 or 24 or 25 or 26 or 27 or 28 or 29                               |
| 31.                                              | 6 AND 18 AND 30                                                                              |

**Table S2.** Grey Literature Search Strategy.

|     |                                             |
|-----|---------------------------------------------|
| 1.  | <b>“Early Childhood Education and Care”</b> |
| 2.  | Kindergarten                                |
| 3.  | Child*                                      |
| 4.  | 1 or 2 or 3                                 |
| 5.  | Nutrition                                   |
| 6.  | Food                                        |
| 7.  | Physical*                                   |
| 8.  | “Screen time”                               |
| 9.  | Sedentary                                   |
| 10. | Sleep                                       |
| 11. | Obes*                                       |
| 12. | 5 or 6 or 7 or 8 or 9 or 10 or 11           |
| 13. | Guideline                                   |
| 14. | Statement                                   |
| 15. | Policy                                      |
| 16. | Recommendation                              |
| 17. | Strategy                                    |
| 18. | 13 or 14 or 15 or 16 or 17                  |
| 19. | 4 and 12 and 18                             |

**Table S3.** Guideline AGREE II appraisal scores.

| <b>Guideline</b>                                                                                                                                  | <b>Scope and Purpose</b> | <b>Stakeholder Involvement</b> | <b>Rigour of Development</b> | <b>Clarity of Presentation</b> | <b>Applicability</b> | <b>Editorial Independence</b> | <b>Overall Assessment</b>        |
|---------------------------------------------------------------------------------------------------------------------------------------------------|--------------------------|--------------------------------|------------------------------|--------------------------------|----------------------|-------------------------------|----------------------------------|
| Ten ways to empower children to live healthy lives: standards to empower child care facilities in Arizona (3rd Ed) (USA)                          | 86%                      | 48%                            | 39%                          | 57%                            | 57%                  | 57%                           | Recommended with modification    |
| Action Plan for Preventing Child and Adolescent Obesity. Promoting Healthy Lifestyles and Preventing Obesity In the Child Care setting (USA)      | 50%                      | 52%                            | 34%                          | 36%                            | 29%                  | 36%                           | Not recommended                  |
| Active Early: a Winconsin guide for improving childhood physical activity (2nd Ed) (USA)                                                          | 93%                      | 86%                            | 57%                          | 100%                           | 86%                  | 86%                           | Recommended with modification    |
| Healthy Bites: a Winconsin guide for improving childhood physical activity (2nd Ed) (USA)                                                         | 93%                      | 95%                            | 57%                          | 93%                            | 93%                  | 71%                           | Recommended with modification    |
| Australian 24-hour movement guidelines for the early years (birth to 5 years) (Australia)                                                         | 100%                     | 71%                            | 43%                          | 93%                            | 36%                  | 100%                          | Recommended with modification    |
| Position of the Academy of Nutrition and Dietetics: Benchmarks for Nutrition in Childcare (USA)                                                   | 100%                     | 90%                            | 52%                          | 57%                            | 71%                  | 100%                          | Recommended with modification    |
| Best Practices for Healthy Eating: a guide to help children grow up healthy (USA)                                                                 | 93%                      | 57%                            | 48%                          | 100%                           | 43%                  | 36%                           | Recommended with modification    |
| Best Practices for Physical Activity: for organizations serving children and youth a guide to help children grow up healthy (USA)                 | 100%                     | 57%                            | 50%                          | 100%                           | 43%                  | 36%                           | Recommended with modification    |
| Canadian 24-hour movement guidelines for the early years (0-4 years): an integration of physical activity, sedentary behaviour and sleep (Canada) | 100%                     | 100%                           | 100%                         | 100%                           | 100%                 | 100%                          | Recommended without modification |
| Caring for Children (Australia)                                                                                                                   | 93%                      | 86%                            | 43%                          | 86%                            | 79%                  | 50%                           | Recommended with modification    |
| Caring for our children, National Health and Safety Performance Standards: Guidelines for Early Care and Education Programs (USA)                 | 93%                      | 81%                            | 71%                          | 100%                           | 93%                  | 57%                           | Recommended without modification |
| Early child care obesity prevention recommendations (USA)                                                                                         | 86%                      | 48%                            | 45%                          | 100%                           | 39%                  | 36%                           | Recommended with modification    |

|                                                                                                                               |      |     |     |      |     |     |                                  |
|-------------------------------------------------------------------------------------------------------------------------------|------|-----|-----|------|-----|-----|----------------------------------|
| Early childhood obesity prevention policies (USA)                                                                             | 93%  | 76% | 68% | 86%  | 71% | 64% | Recommended without modification |
| Eat Better Start Better: Voluntary Food and Drink Guidelines for Early Years Setting in England – a Practical Guide (England) | 100% | 71% | 46% | 100% | 79% | 57% | Recommended with modification    |
| Eating Well for Under-5s in Child Care: Practical and nutritional guidelines, 2nd edition (UK)                                | 100% | 86% | 46% | 93%  | 75% | 43% | Recommended with modification    |
| Enacting eight policies to prevent childhood obesity: projected outcomes for Louisiana (USA)                                  | 100% | 43% | 38% | 100% | 32% | 57% | Recommended with modification    |
| Food and Nutrition Guidelines for Pre-school services (Ireland)                                                               | 100% | 86% | 41% | 57%  | 61% | 43% | Recommended with modification    |
| Food&Nutrition for childcare settings: Best Practice guidance (Wales)                                                         | 100% | 71% | 46% | 79%  | 79% | 43% | Recommended with modification    |
| Get Up & Grow: Healthy Eating and Physical Activity for Early Childhood (Australia)                                           | 100% | 81% | 38% | 100% | 82% | 43% | Recommended with modification    |
| Menu Planning in Childcare (Australia)                                                                                        | 71%  | 52% | 46% | 86%  | 75% | 71% | Recommended with modification    |
| Long Day Care Menu Planner (Australia)                                                                                        | 57%  | 62% | 25% | 86%  | 57% | 50% | Recommended with modification    |
| Start Right, Eat Right (Australia)                                                                                            | 100% | 57% | 34% | 93%  | 75% | 57% | Recommended with modification    |
| Healthy Food and Drink Guidance- Early Learning Services (NZ)                                                                 | 100% | 62% | 43% | 86%  | 25% | 57% | Recommended with modification    |
| Healthy Kids, Healthy Future (USA)                                                                                            | 100% | 57% | 54% | 100% | 46% | 57% | Recommended with modification    |
| Improving healthy weight in children: The healthiest next generation initiative (USA)                                         | 93%  | 90% | 54% | 93%  | 39% | 57% | Recommended with modification    |
| Let's Go! Health Care Toolkit (USA)                                                                                           | 71%  | 71% | 48% | 50%  | 68% | 71% | Recommended with modification    |
| Menu planning guidelines for long day care (Australia)                                                                        | 93%  | 62% | 45% | 93%  | 68% | 57% | Recommended with modification    |
| Missouri Move Smart Child Care (USA)                                                                                          | 86%  | 76% | 34% | 100% | 75% | 36% | Recommended with modification    |

|                                                                                                                                     |      |      |     |      |     |     |                               |
|-------------------------------------------------------------------------------------------------------------------------------------|------|------|-----|------|-----|-----|-------------------------------|
| Model Child care health policies (5th Edition) (USA)                                                                                | 86%  | 86%  | 43% | 57%  | 82% | 79% | Recommended with modification |
| Munch & Move (Australia)                                                                                                            | 100% | 90%  | 52% | 100% | 89% | 79% | Recommended with modification |
| Nutrition and Physical Activity Best Practices for Child Care Centers (USA)                                                         | 86%  | 48%  | 39% | 86%  | 18% | 57% | Recommended with modification |
| Nutritional Guidance for early years food choices for children aged 1-5 years in early education and child-care settings (Scotland) | 100% | 100% | 52% | 86%  | 64% | 71% | Recommended with modification |
| Nutrition and Wellness Tips for Young Children: provider handbook for the child and adult care food program (USA)                   | 100% | 76%  | 34% | 100% | 75% | 64% | Recommended with modification |
| Right Bite, Easy Guide to Healthy Food and Drink Supply for South Australian Schools and Preschools (Australia)                     | 100% | 95%  | 39% | 64%  | 89% | 57% | Recommended with modification |
| Setting the Table- Nutritional Guidance and Food Standards for Early Years Childcare Providers in Scotland (Scotland)               | 100% | 67%  | 55% | 93%  | 57% | 14% | Recommended with modification |
| Sit less, move more, sleep well: Active play guidelines for under-fives (NZ)                                                        | 100% | 71%  | 55% | 93%  | 50% | 36% | Recommended with modification |
| The preschool initiative: building a healthy foundation for life (USA)                                                              | 100% | 76%  | 39% | 57%  | 75% | 43% | Recommended with modification |
| Wellness Guidelines for Alaska's Young Children: A toolkit for child care providers and families (USA)                              | 100% | 57%  | 45% | 100% | 68% | 36% | Recommended with modification |
